# Supplementary material for: Hexacosenoyl-CoA is the most abundant very long-chain acyl-CoA in ATP binding cassette transporter D1-deficient cells
Source: PubMed Central journal article supplement (PMC7112142; doi:10.1194/jlr.p119000325), 2020-02-19
Supplement: supp_P119000325_155112_2_supp_476153_q5pyyv.pdf [file supp_P119000325_155112_2_supp_476153_q5pyyv.pdf]

Supplemental Table S2 The quantity of each PL species in the ABCD1-KO HeLa cells

| Signals             | wild-type ( $n = 3$ ) <sup>a</sup> | KO #1 <sup>a</sup> | KO #2 <sup>a</sup> | KO #3 <sup>a</sup> |
|---------------------|------------------------------------|--------------------|--------------------|--------------------|
| pc32:0              | 2052.2 ± 100.1                     | 1 874.0            | 2 078.4            | 3 112.8            |
| pc32:1              | 3557.9 ± 122.0                     | 3 272.8            | 3 530.3            | 4 200.0            |
| pc32:2              | 2087.7 ± 572.3                     | 2 084.6            | 1 371.6            | 1 035.7            |
| pc34:0              | 1457.0 ± 272.1                     | 936.1              | 1 116.7            | 1 371.3            |
| pc34:1              | 3516.8 ± 138.4                     | 3 271.8            | 4 205.6            | 5 160.9            |
| pc34:2              | 4130.4 ± 542.3                     | 4 000.3            | 3 784.0            | 3 746.6            |
| pc34:3              | 807.8 ± 217.7                      | 868.1              | 580.2              | 558.6              |
| pc34:4              | 179.3 ± 44.3                       | 165.3              | 148.2              | 177.9              |
| pc34:5              | 12.3 ± 3.1                         | 14.2               | 14.6               | 22.0               |
| pc36:0              | 90.8 ± 44.9                        | 34.5               | 32.9               | 43.9               |
| pc36:1              | 2842.1 ± 116.9                     | 2 583.0            | 2 762.7            | 3 208.7            |
| pc36:2              | 3566.0 ± 93.9                      | 3 351.6            | 3 763.4            | 4 277.3            |
| pc36:3              | 3395.7 ± 523.0                     | 3 508.9            | 2 613.8            | 2 507.5            |
| pc36:4              | 2094.0 ± 209.2                     | 1 843.0            | 1 832.8            | 1 882.1            |
| pc36:5              | 1186.9 ± 152.9                     | 976.9              | 1 006.0            | 1 500.8            |
| pc36:6              | 94.8 ± 12.0                        | 79.0               | 100.7              | 129.7              |
| pc38:0              | 17.5 ± 0.6                         | 20.6               | 10.3               | 14.0               |
| pc38:1              | 318.5 ± 33.8                       | 178.5              | 131.9              | 116.2              |
| pc38:2              | 797.8 ± 117.7                      | 734.7              | 614.5              | 315.3              |
| pc38:3              | 1037.7 ± 262.9                     | 1 370.0            | 457.7              | 520.3              |
| pc38:4              | 1002.5 ± 176.0                     | 791.3              | 762.0              | 1 426.4            |
| pc38:5              | 2628.1 ± 56.8                      | 1 967.8            | 2 386.2            | 2 920.4            |
| pc38:6              | 1956.9 ± 122.2                     | 1 483.5            | 1 685.6            | 1 888.1            |
| pc38:7              | 282.4 ± 26.3                       | 225.1              | 249.4              | 248.4              |
| pc38:8              | 12.7 ± 3.8                         | 6.8                | 11.8               | 9.7                |
| pc40:0              | 3.7 ± 0.7                          | 8.0                | 4.8                | 12.5               |
| pc40:1              | 25.2 ± 1.0                         | 42.0               | 24.0               | 29.3               |
| pc40:2              | 107.1 ± 18.0                       | 88.6               | 57.9               | 34.4               |
| pc40:3              | 228.7 ± 88.8                       | 170.0              | 120.2              | 36.6               |
| pc40:4              | 407.1 ± 148.6                      | 338.5              | 197.5              | 163.3              |
| pc40:5              | 622.3 ± 71.7                       | 493.6              | 449.7              | 620.0              |
| pc40:6              | 711.9 ± 116.7                      | 585.0              | 535.8              | 458.8              |
| pc40:7              | 1018 ± 144.1                       | 833.4              | 800.1              | 663.1              |
| pc40:8              | 270.6 ± 79.0                       | 184.3              | 274.9              | 282.6              |
| pc40:9              | 33.1 ± 14.2                        | 23.7               | 51.5               | 57.2               |
| pc40:10             | 2.9 ± 1.1                          | 2.7                | 3.0                | 4.2                |
| pc42:0              | 1.1 ± 0.1                          | 11.8               | 2.2                | 18.7               |
| pc42:1              | 7.7 ± 0.3                          | 37.1               | 11.0               | 30.6               |
| pc42:2              | 23.2 ± 5.9                         | 74.5               | 26.3               | 27.9               |
| pc42:3              | 37.9 ± 14.6                        | 47.8               | 19.1               | 12.1               |
| pc42:4              | 48.4 ± 21.5                        | 42.8               | 19.5               | 12.7               |
| pc42:5              | 66.4 ± 12.8                        | 45.0               | 31.0               | 45.9               |
| pc42:6              | 98.8 ± 5.5                         | 60.5               | 56.5               | 67.0               |
| pc42:7              | 125.0 ± 12.1                       | 82.8               | 75.2               | 63.3               |
| pc42:8              | 91.6 ± 15.7                        | 74.5               | 61.7               | 57.7               |
| pc42:9              | 311.4 ± 79.5                       | 196.9              | 295.5              | 301.1              |
| pc42:10             | 271.8 ± 90.3                       | 151.2              | 354.5              | 365.0              |
| pc42:11             | 20.5 ± 8.1                         | 14.3               | 33.6               | 37.5               |
| pc44:0 <sup>†</sup> | n.a.                               | 3.4                | 0.1                | 4.8                |
| pc44:1              | 1.1 ± 0.3                          | 18.2               | 2.2                | 18.4               |
| pc44:2              | 4.1 ± 1.3                          | 36.6               | 6.3                | 17.1               |
| pc44:3              | 6.8 ± 2.6                          | 35.6               | 9.0                | 8.0                |
| pc44:4              | 7.0 ± 2.6                          | 12.7               | 3.5                | 3.4                |
| pc44:5              | 7.3 ± 1.3                          | 9.1                | 5.5                | 6.7                |
| pc44:6              | 18.6 ± 4.7                         | 15.7               | 10.9               | 12.5               |
| pc44:7              | 26.9 ± 6.7                         | 16.8               | 14.9               | 13.2               |
| pc44:8              | 19.2 ± 4.5                         | 13.8               | 12.1               | 9.7                |
| pc44:9              | 16.8 ± 8.1                         | 5.7                | 9.5                | 20.0               |
| pc44:10             | 68.4 ± 15.6                        | 40.9               | 57.0               | 49.5               |
| pc44:11             | 115.4 ± 35.4                       | 65.5               | 93.1               | 69.5               |
| pc44:12             | 32.7 ± 11.6                        | 18.3               | 38.4               | 27.7               |
| pc46:1              | n.a.                               | 3.0                | n.a.               | 2.7                |
| pc46:2              | 0.1 ± 0.1                          | 5.5                | 0.4                | 2.1                |
| pc46:3              | 0.4 ± 0.3                          | 4.9                | 0.6                | 1.6                |
| pc46:4 <sup>†</sup> | n.a.                               | 1.1                | 0.2                | 5.0                |

| Signals | wild-type (n = 3) <sup>a</sup> | KO #1 <sup>a</sup> | KO #2 <sup>a</sup> | KO #3 <sup>a</sup> |
|---------|--------------------------------|--------------------|--------------------|--------------------|
| nc46:5  | 2.0 ± 0.8                      | 11.5               | 2.5                | 7.4                |
| nc46:6  | 4.9 ± 1.6                      | 10.9               | 3.9                | 5.1                |
| pc46:7  | 2.2 ± 0.8                      | 3.0                | 1.4                | 1.0                |
| pc46:8  | 5.4 ± 2.2                      | 4.4                | 3.2                | 2.5                |
| pc46:9  | 3.3 ± 1.1                      | 1.9                | 1.6                | 2.0                |
| pc46:10 | 3.5 ± 1.2                      | 1.2                | 1.6                | 3.8                |
| pc46:11 | 3.6 ± 1.6                      | 1.1                | 2.0                | 2.7                |
| pc46:12 | 1.3 ± 0.3                      | 0.5                | 0.8                | 0.8                |
| pc48:5  | 0.0 ± 0.1                      | 2.9                | n.a.               | 2.7                |
| pc48:6  | 0.5 ± 0.4                      | 3.0                | 0.7                | 1.5                |
| pc48:7  | 0.9 ± 0.4                      | 1.6                | 0.6                | n.a.               |
| pc48:8  | 1.0 ± 0.3                      | 3.3                | 0.8                | 0.6                |
| pe32:0  | 329.1 ± 64.6                   | 255.4              | 334.0              | 296.9              |
| pe32:1  | 2018.3 ± 450.8                 | 2,530.0            | 1,815.8            | 1,406.6            |
| pe32:2  | 285.0 ± 154.7                  | 392.8              | 196.8              | 119.6              |
| pe34:0  | 317.1 ± 55.6                   | 221.9              | 252.5              | 224.9              |
| pe34:1  | 7827.0 ± 813.5                 | 8,905.1            | 9,725.4            | 9,877.1            |
| pe34:2  | 3652.3 ± 1354.4                | 4,936.8            | 3,262.1            | 2,648.2            |
| pe34:3  | 313.7 ± 162.0                  | 453.0              | 247.1              | 215.9              |
| pe34:4  | 66.4 ± 27.2                    | 106.1              | 86.0               | 75.1               |
| pe34:5  | 2.9 ± 1.2                      | 3.9                | 4.5                | 5.9                |
| pe36:0  | 18.1 ± 4.6                     | 5.7                | 4.3                | 6.9                |
| pe36:1  | 7881.9 ± 243.4                 | 7,515.3            | 8,571.9            | 9,239.2            |
| pe36:2  | 9610.9 ± 1262.2                | 10,990.6           | 11,485.4           | 11,825.2           |
| pe36:3  | 2743.3 ± 1150.7                | 3,791.8            | 2,565.6            | 3,082.9            |
| pe36:4  | 2439.5 ± 840.2                 | 3,564.9            | 2,821.8            | 3,489.3            |
| pe36:5  | 729.6 ± 257.2                  | 1,010.6            | 807.4              | 1,382.5            |
| pe36:6  | 66.4 ± 22.5                    | 103.0              | 110.9              | 117.0              |
| pe36:7  | 2.4 ± 1.2                      | 3.9                | 3.1                | 2.9                |
| pe38:0  | 1.3 ± 0.8                      | 0.5                | 0.8                | 0.8                |
| pe38:1  | 318.0 ± 88.0                   | 75.3               | 109.8              | 106.8              |
| pe38:2  | 1244.1 ± 160.0                 | 933.7              | 1,000.8            | 437.8              |
| pe38:3  | 3159.9 ± 1033.0                | 4,289.3            | 1,880.9            | 1,643.5            |
| pe38:4  | 7374.2 ± 1762.4                | 9,652.9            | 6,461.4            | 10,759.9           |
| pe38:5  | 6857.4 ± 1601.2                | 8,597.9            | 7,584.1            | 12,269.4           |
| pe38:6  | 2474.0 ± 735.6                 | 3,224.2            | 3,338.1            | 4,003.6            |
| pe38:7  | 388.1 ± 168.2                  | 639.5              | 556.6              | 507.8              |
| pe38:8  | 10.8 ± 6.3                     | 15.0               | 13.9               | 5.1                |
| pe40:1  | 57.8 ± 11.1                    | 26.3               | 28.7               | 27.1               |
| pe40:2  | 335.1 ± 38.3                   | 101.4              | 109.1              | 41.5               |
| pe40:3  | 610.2 ± 319.5                  | 542.4              | 316.7              | 101.9              |
| pe40:4  | 1209.1 ± 649.8                 | 936.8              | 799.1              | 1,345.2            |
| pe40:5  | 2490.7 ± 746.8                 | 2,809.8            | 2,862.7            | 4,660.6            |
| pe40:6  | 2063.7 ± 202.7                 | 2,583.1            | 2,773.8            | 4,098.2            |
| pe40:7  | 2213.3 ± 443.7                 | 2,854.8            | 2,855.4            | 2,358.0            |
| pe40:8  | 146.5 ± 51.9                   | 231.1              | 169.3              | 137.4              |
| pe40:9  | 12.4 ± 4.6                     | 17.9               | 17.2               | 19.1               |
| pe40:10 | 2.3 ± 1.6                      | 3.7                | 2.7                | 2.2                |
| pe42:1  | 18.9 ± 1.8                     | 16.7               | 20.3               | 26.3               |
| pe42:2  | 41.2 ± 4.9                     | 29.9               | 28.5               | 19.0               |
| pe42:3  | 67.4 ± 26.4                    | 30.9               | 24.7               | 9.5                |
| pe42:4  | 41.7 ± 26.2                    | 28.6               | 19.3               | 18.5               |
| pe42:5  | 104.2 ± 43.6                   | 70.1               | 55.7               | 87.0               |
| pe42:6  | 126.1 ± 38.1                   | 89.3               | 102.5              | 121.1              |
| pe42:7  | 156.6 ± 60.6                   | 122.2              | 175.4              | 135.0              |
| pe42:8  | 89.4 ± 39.2                    | 104.7              | 82.4               | 58.9               |
| pe42:9  | 84.6 ± 25.4                    | 112.7              | 77.3               | 63.7               |
| pe42:10 | 194.4 ± 93.0                   | 220.4              | 232.7              | 146.1              |
| pe42:11 | 9.2 ± 4.5                      | 9.9                | 11.9               | 10.7               |
| pe44:1  | 0.8 ± 0.1                      | 4.4                | 1.2                | 6.5                |
| pe44:2  | 2.5 ± 0.7                      | 7.8                | 3.3                | 5.2                |
| pe44:3  | 5.3 ± 1.6                      | 7.7                | 3.8                | 3.6                |
| pe44:4  | 2.2 ± 1.0                      | 0.4                | 1.2                | 1.2                |
| pe44:5  | 26.3 ± 9.8                     | 19.5               | 9.3                | 8.2                |
| pe44:6  | 18.2 ± 6.5                     | 18.2               | 12.2               | 6.9                |
| pe44:7  | 13.4 ± 1.3                     | 6.9                | 9.4                | 3.9                |
| pe44:8  | 11.4 ± 4.3                     | 8.2                | 10.0               | 6.0                |
| pe44:9  | 21.0 ± 9.4                     | 13.1               | 14.0               | 10.0               |

| Signals | wild-type ( $n = 3$ ) <sup>a</sup> | KO #1 <sup>a</sup> | KO #2 <sup>a</sup> | KO #3 <sup>a</sup> |
|---------|------------------------------------|--------------------|--------------------|--------------------|
| pe44:10 | 19.1 ± 4.4                         | 17.7               | 21.4               | 18.9               |
| pe44:11 | 27.8 ± 7.7                         | 31.1               | 36.4               | 23.4               |
| pe44:12 | 21.9 ± 6.9                         | 29.2               | 41.5               | 25.9               |
| pe46:5  | 1.6 ± 0.6                          | 4.2                | 1.9                | 4.3                |
| pe46:6  | 4.4 ± 1.8                          | 4.5                | 2.5                | 2.0                |
| pe46:7  | 3.7 ± 0.8                          | 3.2                | 2.4                | 1.7                |
| pe46:8  | 3.1 ± 1.6                          | 2.9                | 2.1                | 0.7                |
| pe46:9  | 2.0 ± 1.2                          | 1.1                | 0.8                | 0.0                |
| pe46:10 | 1.4 ± 0.5                          | 0.6                | 0.7                | 0.9                |
| pe46:11 | 1.1 ± 0.6                          | 0.2                | 0.9                | 0.8                |
| sm32:0  | 163.9 ± 45.6                       | 101.1              | 126.2              | 154.1              |
| sm32:1  | 563.4 ± 72.1                       | 677.6              | 703.9              | 635.3              |
| sm32:2  | 13.5 ± 0.7                         | 12.2               | 14.8               | 14.2               |
| sm34:0  | 1206.9 ± 346.4                     | 911.6              | 1,165.3            | 2,003.1            |
| sm34:1  | 2736.3 ± 447.5                     | 2,782.3            | 4,473.8            | 6,377.6            |
| sm34:2  | 1154.7 ± 119.9                     | 1,353.2            | 1,403.7            | 1,486.0            |
| sm36:0  | 147.8 ± 68.1                       | 67.0               | 80.4               | 83.1               |
| sm36:1  | 487.2 ± 197.6                      | 336.6              | 446.3              | 550.3              |
| sm36:2  | 168.2 ± 51.7                       | 119.3              | 144.8              | 164.9              |
| sm36:3  | 10.7 ± 2.5                         | 8.2                | 9.2                | 10.3               |
| sm38:0  | 64.5 ± 43.9                        | 28.6               | 43.6               | 38.3               |
| sm38:1  | 196.0 ± 31.3                       | 124.8              | 142.1              | 138.4              |
| sm38:2  | 24.5 ± 2.9                         | 23.7               | 26.0               | 23.6               |
| sm38:3  | 6.9 ± 1.0                          | 4.3                | 4.5                | 8.0                |
| sm40:0  | 90.7 ± 53.4                        | 7.4                | 10.4               | 0.0                |
| sm40:1  | 1189.5 ± 159.9                     | 736.6              | 695.1              | 705.5              |
| sm40:2  | 813.9 ± 99.3                       | 570.3              | 580.3              | 445.5              |
| sm40:3  | 44.6 ± 24.5                        | 24.6               | 25.0               | 29.0               |
| sm42:0  | 31.2 ± 15.6                        | 22.4               | 21.5               | 64.9               |
| sm42:1  | 1392.5 ± 176                       | 1,889.8            | 1,378.2            | 2,145.0            |
| sm42:2  | 3640.1 ± 561.8                     | 3,220.9            | 4,143.8            | 4,178.4            |
| sm42:3  | 1399.8 ± 179.2                     | 1,079.4            | 1,153.3            | 1,122.9            |
| sm44:1  | 7.9 ± 1.4                          | 73.8               | 12.7               | 62.0               |
| sm44:2  | 55.7 ± 12.6                        | 257.8              | 68.9               | 119.5              |

<sup>a</sup>pmol/mg protein, n.q. below the quantitation range

\* $p < 0.05$  for KO (#1, #2 and #3)/wild-type  $> 1$  (Mann-Whitney  $U$  test)
