# Supplementary material for: Hexacosenoyl-CoA is the most abundant very long-chain acyl-CoA in ATP binding cassette transporter D1-deficient cells
Source: PubMed Central journal article supplement (PMC7112142; doi:10.1194/jlr.p119000325), 2020-02-19
Supplement: supp_P119000325_155112_2_supp_476154_q5pyyv.pdf [file supp_P119000325_155112_2_supp_476154_q5pyyv.pdf]

Supplemental Table S1 The quantity of each PL species in the X-ALD fibroblasts

| Signals | CCALD ( $n = 4$ ) <sup>a</sup> | AMN ( $n = 3$ ) <sup>a</sup> | Control ( $n = 5$ ) <sup>a</sup> |
|---------|--------------------------------|------------------------------|----------------------------------|
| pc32:0  | 5625.7 ± 734.6 <sup>*#</sup>   | 3939.3 ± 337.3 <sup>*</sup>  | 3741.1 ± 227.8                   |
| pc32:1  | 6962.3 ± 1300.6                | 5813.5 ± 831.5               | 4834.7 ± 427.0                   |
| pc32:2  | 882.8 ± 263.7                  | 766.6 ± 36.9 <sup>*</sup>    | 639.8 ± 59.2                     |
| pc34:0  | 1934.1 ± 242.3                 | 2986.9 ± 1811.8              | 2453.6 ± 1280.1                  |
| pc34:1  | 10675.1 ± 1187.6 <sup>**</sup> | 8288.8 ± 1377.7              | 6468.6 ± 754.3                   |
| pc34:2  | 6705.9 ± 1480.2                | 6126.8 ± 1095.2              | 4999.8 ± 337.8                   |
| pc34:3  | 871.8 ± 271.3                  | 885.7 ± 87.0                 | 670.9 ± 53.3                     |
| pc34:4  | 452.1 ± 212.0                  | 491.9 ± 85.7                 | 303.4 ± 43.4                     |
| pc34:5  | 21.4 ± 10.9                    | 21.9 ± 10.1                  | 13.1 ± 2.9                       |
| pc36:0  | 109.5 ± 28.4                   | 337.4 ± 415.5                | 207.4 ± 253.6                    |
| pc36:1  | 8808.1 ± 1408.4 <sup>*</sup>   | 8008.9 ± 1851.7              | 5762.1 ± 764.6                   |
| pc36:2  | 9817.8 ± 1775.2                | 8421.2 ± 2036.4              | 6707.7 ± 646.7                   |
| pc36:3  | 4536.6 ± 843.2                 | 4624.1 ± 768.7               | 3612.0 ± 280.3                   |
| pc36:4  | 4751.4 ± 768.2 <sup>*</sup>    | 4246.4 ± 623.3               | 3211.8 ± 409.1                   |
| pc36:5  | 1150.1 ± 373.1                 | 1209.0 ± 301.3               | 863.2 ± 178.8                    |
| pc36:6  | 80.8 ± 29.9                    | 85.9 ± 30.6                  | 58.3 ± 11.5                      |
| pc38:0  | 24.1 ± 2.7 <sup>#</sup>        | 36.2 ± 2.5                   | 28.9 ± 4.8                       |
| pc38:1  | 182.1 ± 12.2                   | 236.9 ± 78.4                 | 187.9 ± 20.9                     |
| pc38:2  | 416.7 ± 145.6                  | 496.0 ± 170.3                | 279.2 ± 23.6                     |
| pc38:3  | 1624.0 ± 181.0                 | 2514.7 ± 1028.4              | 1440.8 ± 341.7                   |
| pc38:4  | 5507.1 ± 671.0 <sup>*</sup>    | 4998.0 ± 803.5               | 3811.5 ± 412.4                   |
| pc38:5  | 5913.5 ± 1136.4                | 5388.5 ± 1185.8              | 4034.8 ± 530.7                   |
| pc38:6  | 1514.1 ± 453.5                 | 1605.3 ± 442.9               | 1086.4 ± 241.7                   |
| pc38:7  | 181.4 ± 63.2                   | 188.5 ± 41.8                 | 145.7 ± 35.9                     |
| pc38:8  | 7.4 ± 3.8                      | 9.0 ± 2.1                    | 4.4 ± 0.7                        |
| pc40:0  | 13.6 ± 2.1                     | 20.6 ± 6.7                   | 6.3 ± 0.7                        |
| pc40:1  | 27.8 ± 2.1 <sup>*</sup>        | 41.5 ± 16.5                  | 17.7 ± 1.5                       |
| pc40:2  | 43.7 ± 8.0                     | 61.5 ± 30.8                  | 32.7 ± 4.6                       |
| pc40:3  | 46.7 ± 6.0                     | 69.2 ± 20.9                  | 42.3 ± 6.2                       |
| pc40:4  | 590.1 ± 105.0                  | 700.3 ± 27.5                 | 649.1 ± 198.9                    |
| pc40:5  | 1980.5 ± 184.3                 | 2009.5 ± 313.4               | 1634.6 ± 364.1                   |
| pc40:6  | 1013.6 ± 345.5                 | 891.9 ± 127.4                | 692.0 ± 115.2                    |
| pc40:7  | 729.5 ± 304.7                  | 634.2 ± 156.7                | 427.1 ± 75.9                     |
| pc40:8  | 147.2 ± 65.1                   | 163.1 ± 65.6                 | 86.6 ± 12.3                      |
| pc40:9  | 15.9 ± 7.4                     | 19.6 ± 10.7                  | 8.6 ± 1.5                        |
| pc40:10 | 1.2 ± 1.7                      | 1.6 ± 1.5                    | 0.8 ± 0.5                        |
| pc42:0  | 18.6 ± 3.7                     | 32.1 ± 16.0                  | 1.8 ± 0.3                        |
| pc42:1  | 35.9 ± 5.7 <sup>**</sup>       | 58.4 ± 35.4                  | 12.1 ± 3.1                       |
| pc42:2  | 28.7 ± 4.9 <sup>*</sup>        | 44.7 ± 27.0                  | 13.6 ± 3.9                       |
| pc42:3  | 20.6 ± 3.7 <sup>*</sup>        | 28.6 ± 13.0                  | 13.1 ± 2.6                       |
| pc42:4  | 38.8 ± 8.0                     | 44.3 ± 9.7                   | 48.3 ± 14.6                      |
| pc42:5  | 129.2 ± 23.3                   | 127.7 ± 25.1                 | 134.9 ± 35.5                     |
| pc42:6  | 110.5 ± 21.9                   | 103.2 ± 20.6                 | 102.6 ± 20.3                     |
| pc42:7  | 106.9 ± 34.9                   | 99.2 ± 10.8                  | 77.6 ± 14.6                      |
| pc42:8  | 113.1 ± 45.1                   | 89.2 ± 5.4                   | 68.1 ± 12.9                      |
| pc42:9  | 251.8 ± 124.2                  | 213.3 ± 59.4                 | 128.6 ± 27.6                     |
| pc42:10 | 121.0 ± 48.9                   | 122.3 ± 62.8                 | 68.7 ± 12.9                      |
| pc42:11 | 4.7 ± 1.8                      | 5.9 ± 4.5                    | 2.7 ± 1.0                        |
| pc44:0  | 6.1 ± 1.5                      | 9.9 ± 4.7                    | n.q.                             |
| pc44:1  | 29.5 ± 12.4 <sup>*</sup>       | 45.0 ± 32.6                  | 1.4 ± 0.9                        |
| pc44:2  | 23.2 ± 6.8 <sup>*</sup>        | 37.7 ± 25.4                  | 3.0 ± 0.9                        |
| pc44:3  | 9.8 ± 2.3                      | 13.4 ± 8.1                   | 2.9 ± 1.1                        |
| pc44:4  | 9.8 ± 3.4                      | 11.0 ± 4.6                   | 5.0 ± 1.8                        |
| pc44:5  | 19.4 ± 5.0                     | 19.3 ± 6.7                   | 10.8 ± 3.3                       |
| pc44:6  | 15.8 ± 5.4                     | 17.2 ± 7.4                   | 14.4 ± 4.4                       |
| pc44:7  | 24.5 ± 10.3                    | 25.0 ± 7.1                   | 21.7 ± 6.2                       |
| pc44:8  | 30.1 ± 11.0                    | 23.1 ± 4.6                   | 27.7 ± 8.0                       |
| pc44:9  | 49.2 ± 15.8                    | 39.6 ± 3.2                   | 41.3 ± 8.1                       |
| pc44:10 | 52.0 ± 21.7                    | 45.4 ± 8.6                   | 31.3 ± 6.0                       |
| pc44:11 | 59.9 ± 33.5                    | 47.2 ± 17                    | 26.8 ± 7.2                       |
| pc44:12 | 9.1 ± 4.0                      | 7.1 ± 3.5                    | 4.6 ± 1.4                        |
| pc46:0  | n.q.                           | 1.1 ± 1.1                    | n.q.                             |
| pc46:1  | 4.7 ± 2.5                      | 6.0 ± 4.3                    | n.q.                             |
| pc46:2  | 4.2 ± 2.1                      | 5.3 ± 3.3                    | n.q.                             |
| pc46:3  | 3.5 ± 1.0                      | 3.5 ± 1.6                    | n.q.                             |
| pc46:4  | 12.9 ± 4.6                     | 12.2 ± 7.7                   | 0.2 ± 0.5                        |

| Signals | CCALD ( $n = 4$ ) <sup>a</sup> | AMN ( $n = 3$ ) <sup>a</sup> | Control ( $n = 5$ ) <sup>a</sup> |
|---------|--------------------------------|------------------------------|----------------------------------|
| pc46:5  | 14.4 ± 4.0                     | 14.3 ± 6.9                   | 1.9 ± 0.5                        |
| pc46:6  | 7.3 ± 2.0                      | 8.4 ± 4.6                    | 2.7 ± 1.1                        |
| pc46:7  | 2.6 ± 1.9                      | 3.0 ± 1.3                    | 2.3 ± 1.3                        |
| pc46:8  | 8.4 ± 3.6                      | 7.0 ± 3.1                    | 9.5 ± 4.4                        |
| pc46:9  | 7.2 ± 3.2                      | 4.6 ± 0.7                    | 6.5 ± 2.4                        |
| pc46:10 | 7.9 ± 3.1                      | 6.1 ± 2.0                    | 7.4 ± 2.9                        |
| pc46:11 | 2.4 ± 1.9                      | 2.0 ± 0.6                    | 1.9 ± 0.7                        |
| pc48:4  | 2.0 ± 1.9                      | 1.5 ± 1.5                    | n.q.                             |
| pc48:5  | 5.6 ± 2.2                      | 5.2 ± 2.9                    | n.q.                             |
| pc48:6  | 1.5 ± 1.1                      | 1.9 ± 0.7                    | n.q.                             |
| pc48:10 | 1.2 ± 1.4                      | 0.8 ± 0.8                    | 1.3 ± 0.8                        |
| pe32:0  | 382.3 ± 131.4                  | 253.6 ± 47.6                 | 355.1 ± 170.2                    |
| pe32:1  | 860.5 ± 181.8                  | 911.0 ± 112.0                | 828.1 ± 175.0                    |
| pe32:2  | 72.5 ± 20.0                    | 84.5 ± 10.0                  | 69.5 ± 13.8                      |
| pe34:0  | 556.4 ± 170.7                  | 539.5 ± 82.5                 | 628.6 ± 214.4                    |
| pe34:1  | 8837.3 ± 1774.1                | 11493.7 ± 3386               | 8192.4 ± 1358.2                  |
| pe34:2  | 1917.4 ± 460.0                 | 2419.7 ± 421.9               | 1782.2 ± 237.2                   |
| pe34:4  | 83.4 ± 28.6                    | 106.0 ± 13.6                 | 67 ± 12.4                        |
| pe34:5  | 2.3 ± 1.2                      | 3.5 ± 1.6                    | 2.0 ± 0.7                        |
| pe36:0  | 29.6 ± 7.3                     | 37.4 ± 10.9                  | 31.6 ± 10.8                      |
| pe36:1  | 13922.4 ± 2513.5               | 18709.6 ± 3210.3             | 12814.5 ± 2693.5                 |
| pe36:2  | 8602.3 ± 1458.7                | 12374.0 ± 3173.9             | 8199.3 ± 876.6                   |
| pe36:3  | 1755.8 ± 317.3                 | 2619.7 ± 481.7               | 1799.6 ± 253.1                   |
| pe36:4  | 1682.4 ± 349.1                 | 2249.5 ± 626.5               | 1622.9 ± 229.9                   |
| pe36:5  | 229.7 ± 76.3                   | 321.7 ± 109.4                | 223.3 ± 51.8                     |
| pe36:6  | 38.4 ± 9.7                     | 53.8 ± 12.5                  | 43.6 ± 6.3                       |
| pe36:7  | n.q.                           | 1.9 ± 0.8                    | 0.8 ± 0.7                        |
| pe38:0  | 3.1 ± 0.7                      | 3.8 ± 2.0                    | 2.9 ± 1.0                        |
| pe38:1  | 331.4 ± 43.5                   | 408.3 ± 64.5                 | 322.3 ± 68.0                     |
| pe38:2  | 344.4 ± 64.5                   | 558.4 ± 112.2                | 351.8 ± 61.3                     |
| pe38:3  | 2318.7 ± 675.3                 | 4483.6 ± 1380.2              | 2873.6 ± 833.4                   |
| pe38:4  | 12768.6 ± 1304.7               | 16222.0 ± 4100.8             | 12409.2 ± 500.2                  |
| pe38:5  | 6158.7 ± 1271.9                | 8561.6 ± 2276.5              | 5741.9 ± 488.8                   |
| pe38:6  | 2474.6 ± 693.8                 | 2885.2 ± 636.2               | 2238.5 ± 513.3                   |
| pe38:7  | 483.8 ± 238.2                  | 422.8 ± 68.2                 | 323.2 ± 43.7                     |
| pe38:8  | 2.0 ± 2.2                      | 2.1 ± 2.8                    | 2.7 ± 3.1                        |
| pe40:0  | 3.4 ± 1.0                      | 3.5 ± 1.6                    | 1.8 ± 1.1                        |
| pe40:1  | 142.2 ± 50.1                   | 159.5 ± 69.3                 | 157.9 ± 37.7                     |
| pe40:2  | 184.6 ± 45.0                   | 213.0 ± 46.7                 | 186.2 ± 50.2                     |
| pe40:3  | 86.3 ± 19.7                    | 166.2 ± 18.2                 | 101.4 ± 34.7                     |
| pe40:4  | 4144.6 ± 1443.9                | 4581.9 ± 840.1               | 3959.6 ± 1555.3                  |
| pe40:5  | 6328.9 ± 1758.0                | 6925.2 ± 656.5               | 6111.2 ± 2206.2                  |
| pe40:6  | 4781.3 ± 1493.2                | 3840.2 ± 770.6               | 3401.8 ± 1059.9                  |
| pe40:7  | 2462.9 ± 744.2                 | 2508.0 ± 489.0               | 1961.9 ± 540.7                   |
| pe40:8  | 157.0 ± 86.6                   | 194.2 ± 47.4                 | 101.4 ± 23.4                     |
| pe40:9  | 18.8 ± 13.8                    | 25.3 ± 9.0                   | 10.8 ± 3.2                       |
| pe40:10 | 1.8 ± 2.5                      | 2.7 ± 1.0                    | 1.0 ± 1.0                        |
| pe42:0  | 0.6 ± 0.7                      | 2.2 ± 1.9                    | n.q.                             |
| pe42:1  | 159.6 ± 47.4                   | 186.2 ± 113.4                | 108.9 ± 34.4                     |
| pe42:2  | 117.4 ± 26.1                   | 120.7 ± 41.7                 | 83.6 ± 29.1                      |
| pe42:3  | 42.9 ± 12.9                    | 50.5 ± 19.0                  | 38.1 ± 12.5                      |
| pe42:4  | 48.5 ± 20.0                    | 70.2 ± 13.4                  | 77.5 ± 36.0                      |
| pe42:5  | 172.2 ± 45.5                   | 219.0 ± 15.9                 | 210.6 ± 60.4                     |
| pe42:6  | 113.9 ± 33.0                   | 163.1 ± 13.5                 | 125.5 ± 38.4                     |
| pe42:7  | 143.1 ± 41.6                   | 172.6 ± 22.5                 | 123.9 ± 41.9                     |
| pe42:8  | 88.6 ± 22.7                    | 138.2 ± 1.2                  | 80.7 ± 26.3                      |
| pe42:9  | 33.6 ± 13.9                    | 51.6 ± 8.1                   | 28.5 ± 6.8                       |
| pe42:10 | 45.9 ± 21.8                    | 56.3 ± 14.6                  | 34.2 ± 7.9                       |
| pe42:11 | 1.3 ± 2.1                      | 1.7 ± 1.5                    | 1.0 ± 0.6                        |
| pe44:1  | 54.6 ± 23.5                    | 61.2 ± 36.7                  | 5.1 ± 1.5                        |
| pe44:2  | 30.4 ± 13.0                    | 33.3 ± 16.2                  | 6.0 ± 2.1                        |
| pe44:3  | 13.3 ± 5.3                     | 16.0 ± 7.9                   | 7.3 ± 2.5                        |
| pe44:4  | 7.0 ± 5.2                      | 7.5 ± 2.9                    | 6.4 ± 4.5                        |
| pe44:5  | 34.2 ± 14.0                    | 41.1 ± 21.2                  | 27.5 ± 14.4                      |

| Signals | CCALD ( $n = 4$ ) <sup>a</sup> | AMN ( $n = 3$ ) <sup>a</sup> | Control ( $n = 5$ ) <sup>a</sup> |
|---------|--------------------------------|------------------------------|----------------------------------|
| pe44:6  | 14.1 ± 7.1                     | 12.1 ± 3.1                   | 18.0 ± 9.6                       |
| pe44:7  | 12.7 ± 6.0                     | 3.1 ± 2.8                    | 8.0 ± 6.2                        |
| pe44:8  | 13.6 ± 5.3                     | 16.4 ± 6.3                   | 16.2 ± 5.4                       |
| pe44:9  | 17.0 ± 6.3                     | 24.8 ± 4.3                   | 21.4 ± 3.7                       |
| pe44:10 | 11.0 ± 4.7                     | 15.7 ± 0.8                   | 10.6 ± 3.1                       |
| pe44:11 | 5.6 ± 3.1                      | 9.8 ± 2.5                    | 6.1 ± 1.8                        |
| pe44:12 | 2.7 ± 1.8                      | 5.4 ± 2.6                    | 3.1 ± 0.8                        |
| pe46:1  | 0.2 ± 0.4                      | 1.6 ± 1.4                    | n.q.                             |
| pe46:2  | 0.6 ± 1.2                      | 1.4 ± 1.3                    | n.q.                             |
| pe46:3  | n.q.                           | 1.6 ± 1.6                    | n.q.                             |
| pe46:5  | 14.1 ± 7.7                     | 14.8 ± 3.8                   | 7.0 ± 5.1                        |
| pe46:6  | 12.8 ± 6.8                     | 9.3 ± 0.4                    | 7.1 ± 5.7                        |
| pe46:7  | 8.8 ± 5.4                      | 5.6 ± 1.5                    | 4.2 ± 2.7                        |
| pe46:10 | 1.6 ± 1.2                      | 2.4 ± 0.3                    | 3.1 ± 1.4                        |
| pe46:11 | 1.2 ± 1.9                      | 0.7 ± 1.2                    | 1.6 ± 0.9                        |
| pe48:5  | 2.9 ± 2.1                      | 1.3 ± 1.1                    | n.q.                             |
| pe48:6  | 1.3 ± 1.5                      | 1.1 ± 0.9                    | n.q.                             |
| sm32:0  | 373.0 ± 30.7                   | 423.6 ± 195.1                | 360.5 ± 43.9                     |
| sm32:1  | 1503.9 ± 226.5                 | 1563.2 ± 80.7 <sup>**</sup>  | 1135.2 ± 111.3                   |
| sm32:2  | 31.8 ± 5.7                     | 40.1 ± 6.7                   | 24.5 ± 5.2                       |
| sm34:0  | 4753.4 ± 1001.0                | 3196.5 ± 2545.1              | 4010.7 ± 594.0                   |
| sm34:1  | 20207.5 ± 2496.3 <sup>**</sup> | 13219.1 ± 2755.5             | 11768.5 ± 1048.5                 |
| sm34:2  | 2294.6 ± 202.9                 | 3138.9 ± 387.8 <sup>#</sup>  | 2098.5 ± 412.7                   |
| sm36:0  | 206.8 ± 41.4                   | 161.5 ± 138.5                | 225.7 ± 53.5                     |
| sm36:1  | 2064.6 ± 494.6                 | 1959.6 ± 812.6               | 2029.6 ± 186.2                   |
| sm36:2  | 517.4 ± 190.9                  | 635.5 ± 248.1                | 424.9 ± 73.0                     |
| sm36:3  | 32.0 ± 8.8                     | 35.2 ± 9.4                   | 25.8 ± 5.2                       |
| sm38:0  | 61.6 ± 9.7                     | 80.0 ± 14.2                  | 75.5 ± 13.2                      |
| sm38:1  | 366.4 ± 66.5 <sup>*</sup>      | 579.1 ± 347.9                | 547.3 ± 99.5                     |
| sm38:2  | 48.3 ± 5.6                     | 85.5 ± 63.2                  | 55.2 ± 12.5                      |
| sm38:3  | 31.9 ± 7.4                     | 23.9 ± 3.0                   | 19.7 ± 4.5                       |
| sm40:0  | 161.7 ± 62.6                   | 96.6 ± 91.6                  | 173.8 ± 55.3                     |
| sm40:1  | 2496.2 ± 625.8                 | 2460.8 ± 449.4               | 3494.5 ± 600.4                   |
| sm40:2  | 1044.5 ± 175.3                 | 1407.9 ± 389.6               | 1347.2 ± 223.1                   |
| sm40:3  | 7.9 ± 15.8                     | 38.5 ± 66.8                  | 15.7 ± 35.0                      |
| sm42:0  | 78.6 ± 14.7                    | 71.6 ± 70.6                  | 78.8 ± 16.9                      |
| sm42:1  | 4925.8 ± 1227.5                | 4577.2 ± 655.4               | 5027.6 ± 852.6                   |
| sm42:2  | 9785.3 ± 2823.5                | 10046.7 ± 1290.7             | 9760.5 ± 944.0                   |
| sm42:3  | 2819.7 ± 772.5                 | 2839.5 ± 412.3               | 3072.2 ± 370.2                   |
| sm44:1  | 248.2 ± 77.4 <sup>*</sup>      | 193.3 ± 21.8 <sup>**</sup>   | 42.0 ± 9.0                       |
| sm44:2  | 420.6 ± 129.4                  | 355.6 ± 37.9 <sup>*</sup>    | 153.6 ± 22.8                     |
| sm44:3  | 258.3 ± 86.7                   | 232.1 ± 30.8 <sup>*</sup>    | 136.2 ± 18.9                     |
| sm46:1  | 1.4 ± 1.2                      | 0.6 ± 1                      | n.q.                             |
| sm46:2  | 2.6 ± 1.5                      | 2.0 ± 0.8                    | n.q.                             |
| sm46:3  | 2.1 ± 1.6                      | 2.1 ± 0.5                    | 0.4 ± 0.5                        |

<sup>a</sup>pmol/mg protein, n.q. below the quantitation range

<sup>\*</sup> $p < 0.05$ , <sup>\*\*</sup> $p < 0.01$  vs. control (Dunnett T3 post hoc test)

<sup>#</sup> $p < 0.05$  vs. AMN (Dunnett T3 post hoc test)
