# Supplementary material for: Hexacosenoyl-CoA is the most abundant very long-chain acyl-CoA in ATP binding cassette transporter D1-deficient cells
Source: PubMed Central journal article supplement (PMC7112142; doi:10.1194/jlr.p119000325), 2020-02-19
Supplement: supp_P119000325_155112_2_supp_476155_q5pyyv.pdf [file supp_P119000325_155112_2_supp_476155_q5pyyv.pdf]

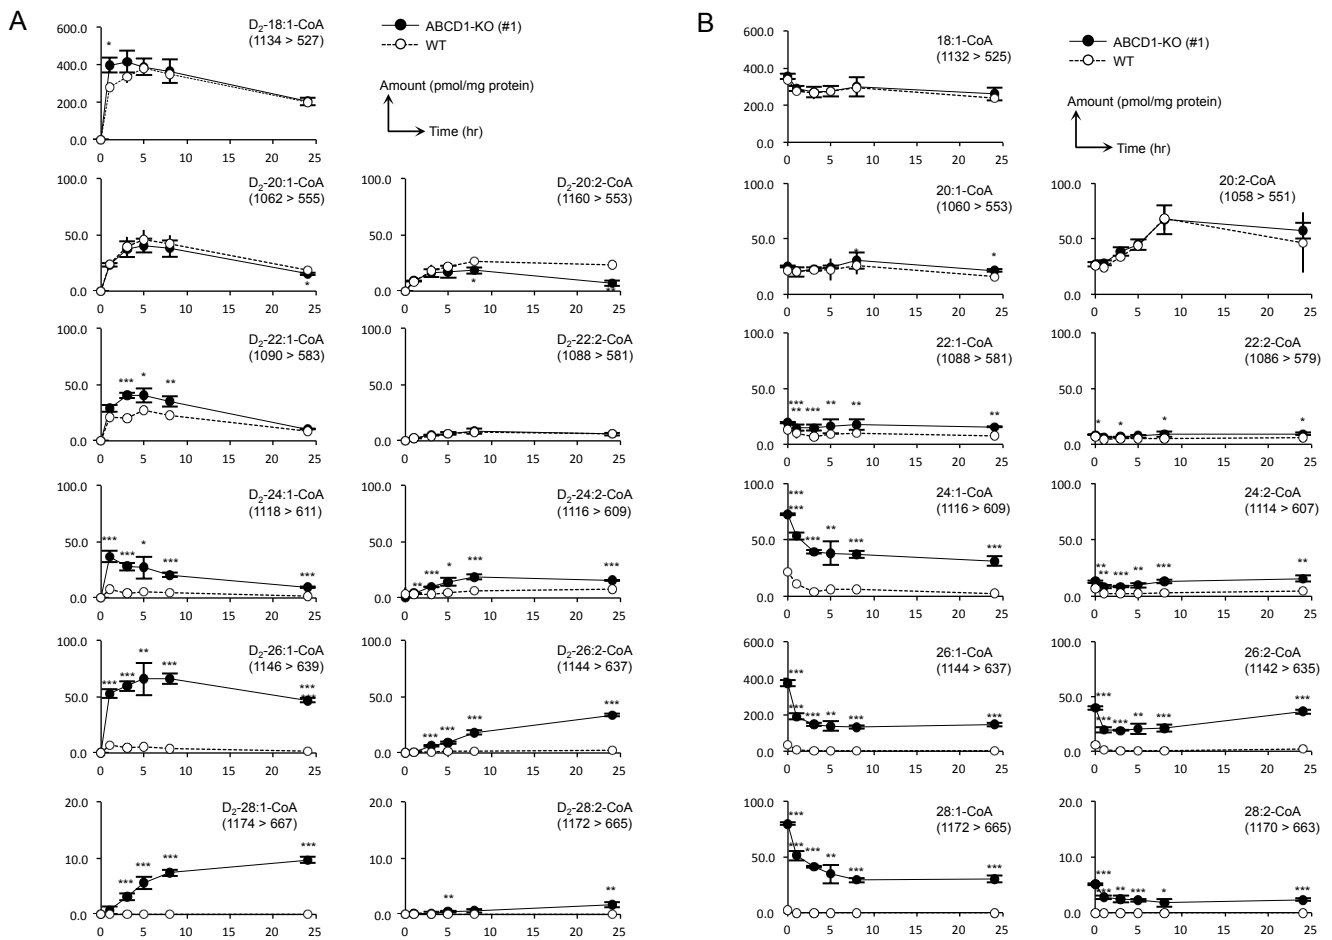

**Supplemental Figure S3.** Metabolic analysis of VLCFA-CoA species using FA D<sub>2</sub>-18:1. Metabolic profiles of each labeled or non-labeled acyl-CoA species were examined in ABCD1-KO (#1) and wild-type (WT) HeLa cells. Deuterium-labeled acyl-CoA species (A) and non-labeled acyl-CoA species (B) are represented. Note that the four panels for D<sub>2</sub>-18:1-, D<sub>2</sub>-26:1-, 18:1-, and 26:1-CoA are identical with those shown in Fig. 5. Statistical analyses were performed with Student's *t*-test; \**p* < 0.05, \*\**p* < 0.01, \*\*\**p* < 0.001
