# Supplementary material for: Hexacosenoyl-CoA is the most abundant very long-chain acyl-CoA in ATP binding cassette transporter D1-deficient cells
Source: PubMed Central journal article supplement (PMC7112142; doi:10.1194/jlr.p119000325), 2020-02-19
Supplement: supp_P119000325_155112_2_supp_476156_q5pyyv.pdf [file supp_P119000325_155112_2_supp_476156_q5pyyv.pdf]

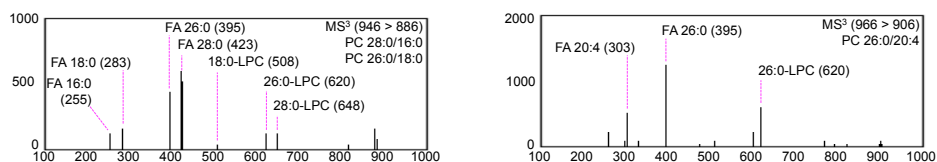

**Supplemental Figure S2.** The product ion spectra of VLCFA-PL species present in quantities significantly higher in the ABCD1-KO HeLa cells. The ions corresponding to  $[M+HCOO]^-$  and  $[M-CH_3]^-$  were selected as the first and second precursor ions, respectively in LC-MS<sup>3</sup> analysis
